# Supplementary material for: Effects of Thermal Acclimation on the Tolerance of Bactrocera zonata (Diptera: Tephritidae) to Hydric Stress
Source: Frontiers journal article supplement (doi:10.3389/fphys.2021.686424), 2021-09-03

**Effects of thermal acclimation on the tolerance of *Bactrocera zonata* (Diptera: Tephritidae) to hydric stress**

**Supplementary figure S1.** Association (Pearson correlation) between survival time and fresh weight of *Bactrocera zonata* female (red circles) and male (blue circles) acclimated for 5-10 days or 11-20 days (short and long acclimation periods, respectively) at three different acclimation temperatures. Censored observations corresponding with flies who remained alive at the end of the assays and included in our survival models (Fig. 4), were omitted from this analysis.

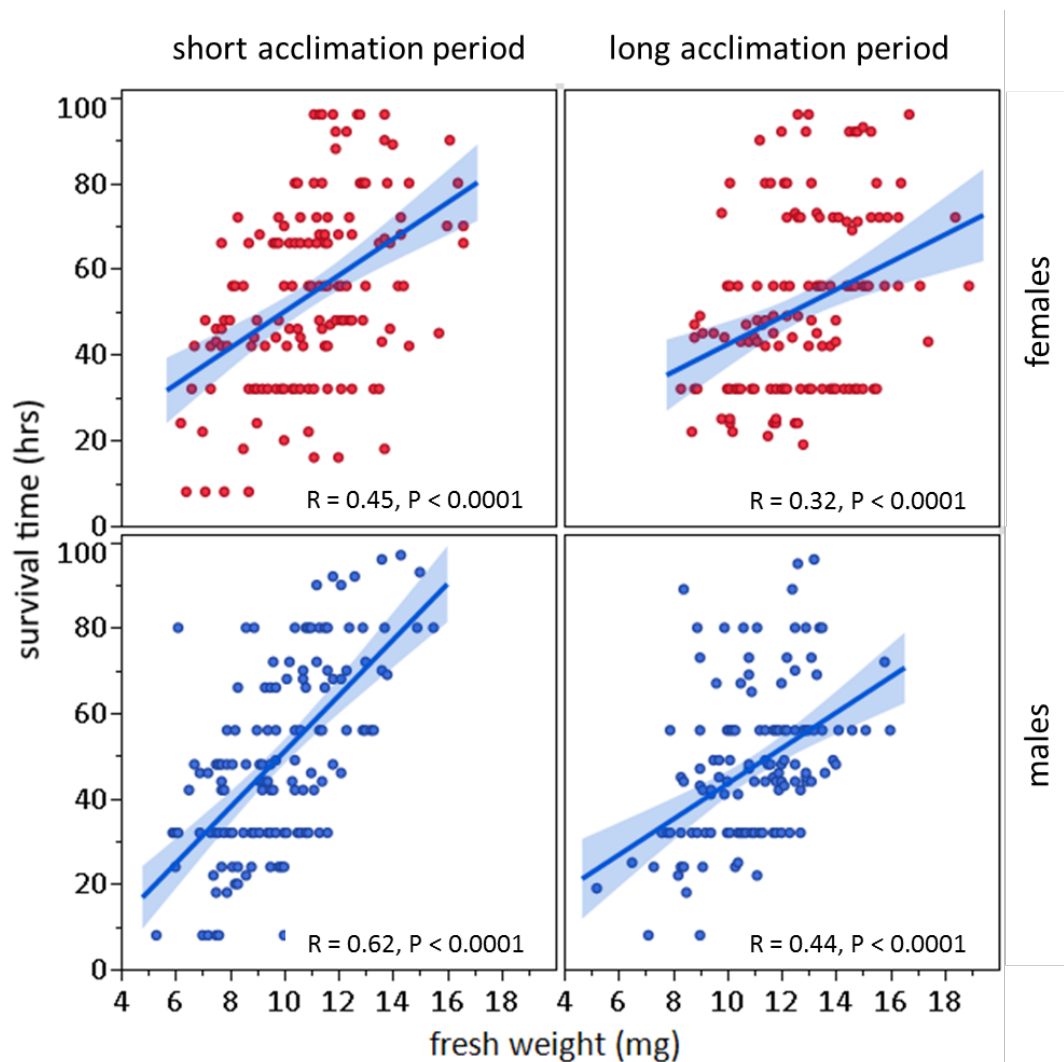

Supplement: Image_1.pdf [file Image_1.pdf]
